# Supplementary material
Source: PubMed Central journal article supplement (PMC1459036)
Supplement: pnas_0602039103_9.pdf [file pnas_0602039103_9.pdf]

**Table 4. Intron and exon statistics for *Arabidopsis* and rice**

|                               | <i>Arabidopsis</i> | Rice           |
|-------------------------------|--------------------|----------------|
| <b>Introns</b>                | 94,342             | 111,343        |
| <b>Average length, bp</b>     | 173                | 433            |
| <b>Median length, bp</b>      | 101                | 160            |
| <b>GC-content</b>             | 32.7%              | 37.3%          |
| <b>Long introns (&gt;1kb)</b> | 762 (0.8%)         | 11,541 (10.4%) |
| <b>Total exons</b>            | 128,098            | 166,057        |
| <b>Internal exons</b>         | 78,323             | 92,336         |
| <b>Average length, bp</b>     | 172                | 193            |
| <b>Median length, bp</b>      | 116                | 119            |
| <b>GC content</b>             | 42.4%              | 48.6%          |
